# Supplementary material
Source: PubMed Central journal article supplement (PMC5922282)
Supplement: jciinsight-3-96151-s001.pdf [file jciinsight-3-96151-s001.pdf]

## SUPPLEMENTAL INFORMATION

### Supplemental Figures

**Fig. S1** Liver weight and hepatic/plasma metabolites in *Lrh-1<sup>AAV8-GFP</sup>* and *Lrh-1<sup>AAV8-Cre</sup>* mice on SD.

**Fig. S2** *Lrh-1<sup>AAV8-Cre</sup>* fed SD exhibit normal rate of VLDL secretion and improved plasma cholesterol profile on HFD.

**Fig. S3** *Lrh-1<sup>AAV8-Alb-Cre</sup>* mice fed HFD do not exhibit significant changes in lipid metabolism.

**Fig S4.** Volcano plot of DEGs in *Lrh-1<sup>AAV8-Cre</sup>* fed HFD.

**Fig. S5** Validation of DEGs and expression of known risk alleles for NAFLD in *Lrh-1<sup>AAV8-Cre</sup>* mice fed standard diet.

**Fig. S6** Additional phospholipid totals showing elevated LPL in *Lrh-1<sup>AAV8-Cre</sup>* livers.

**Fig. S7** Additional genes complemented by hLRH-1, hepatic/plasma cholesterol and plasma ALT measurements in *Lrh-1<sup>AAV8-Cre+hLrh1</sup>*.

**Fig. S8** Profile of early changes in gene expression and plasma cholesterol levels after acute ablation of LRH-1 in livers of *Lrh-1<sup>AAV8-Cre</sup>*.

### Supplemental Tables

**Table S1** Sequences of forward and reverse primers used in this study.

### Supplemental Data Files

**Data Set 1** - Significant DEG changes on SD and HFD after loss of LRH-1 on separate tabs.

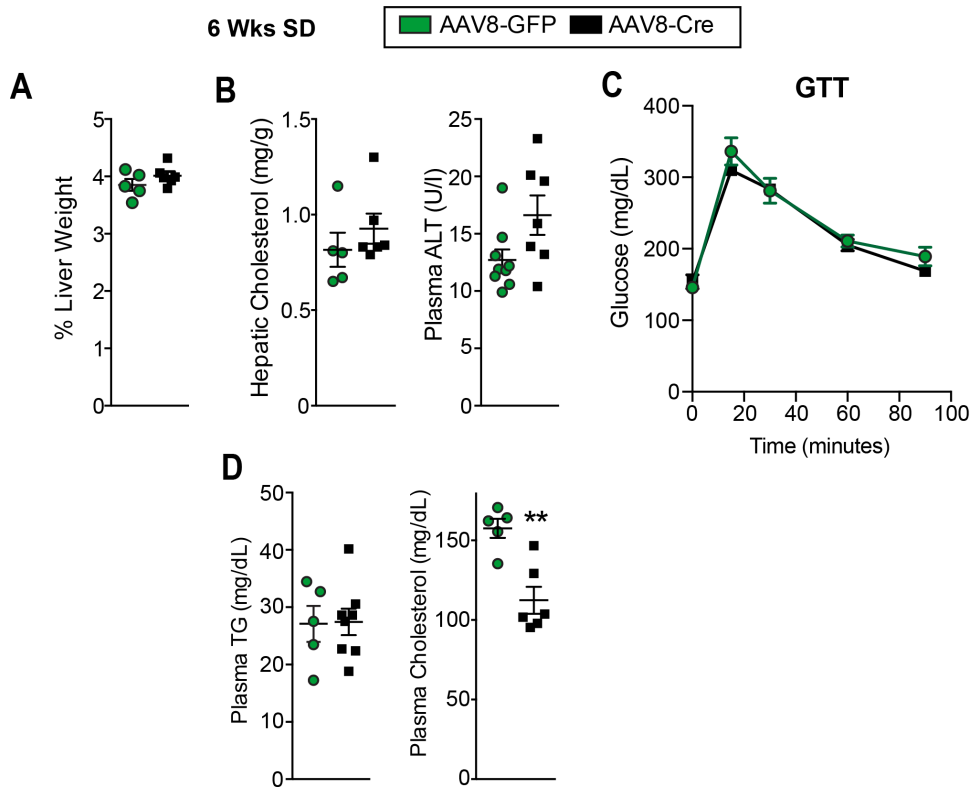

**Supplemental Fig. 1** Liver weights and hepatic/plasma metabolites in *Lrh-1*<sup>AAV-GFP</sup> and *Lrh-1*<sup>AAV-Cre</sup> mice on standard diet (SD).

**(A)** Percent liver weight of *Lrh-1*<sup>AAV8-GFP</sup> and *Lrh-1*<sup>AAV8-Cre</sup> adult male mice fed standard diet 8 wks post infection **(B)** Measurement of hepatic cholesterol levels and plasma ALT levels on fasted *Lrh-1*<sup>AAV8-GFP</sup> and *Lrh-1*<sup>AAV8-Cre</sup>. **(C)** GTT (i.p.) assay on fasted *Lrh-1*<sup>AAV8-GFP</sup> and *Lrh-1*<sup>AAV8-Cre</sup>. **(D)** Measurements of plasma lipids from fasted *Lrh-1*<sup>AAV-GFP</sup> and *Lrh-1*<sup>AAV8-Cre</sup> mice; n = 5 and n = 6 per group, respectively. Error bars represent ± SEM. Unpaired Student's *t* test for panels (a, d).

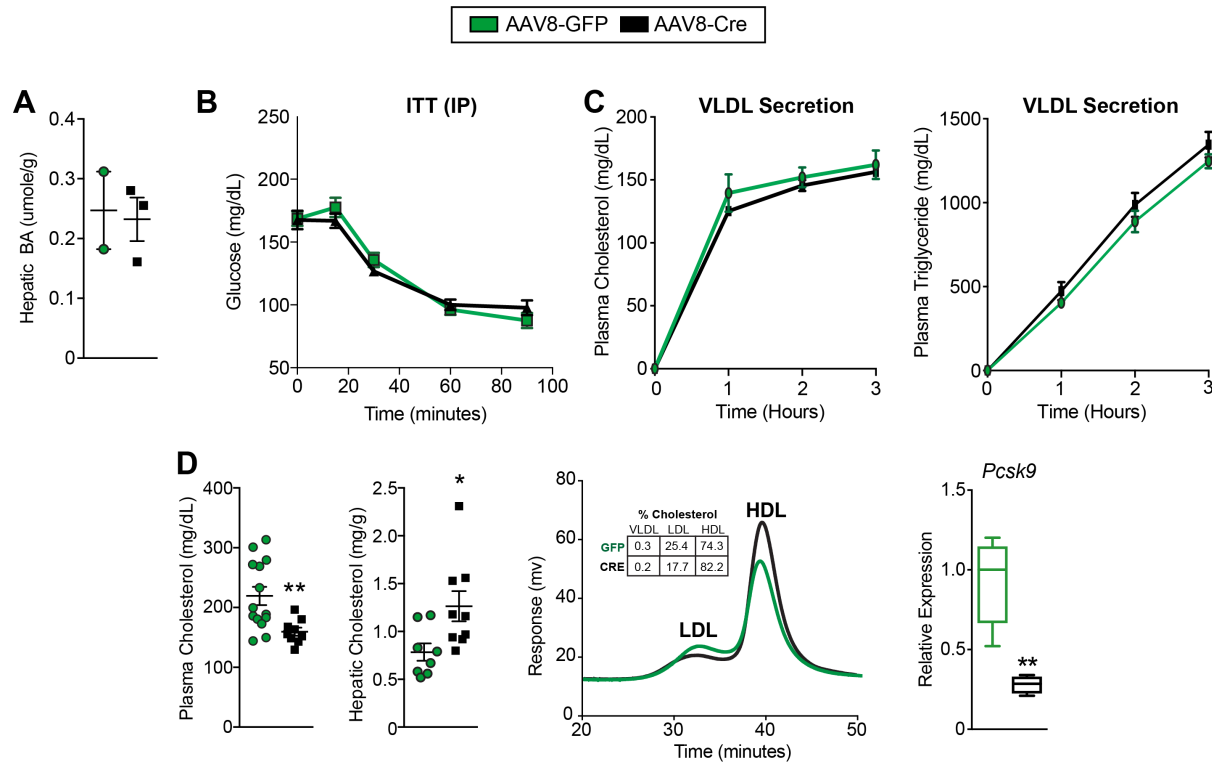

**Supplemental Fig. 2 *Lrh-1*<sup>AAV-Cre</sup> mice exhibit normal rate of VLDL secretion on SD and improved plasma cholesterol profile on HFD.**

**(A)** Measurement of hepatic bile acids from livers of *Lrh-1*<sup>AAV8-GFP</sup> and *Lrh-1*<sup>AAV8-Cre</sup> male mice fed HFD for 6 wks and 8 wks post infection; n = 2, n = 3, respectively. **(B)** ITT on fasted *Lrh-1*<sup>AAV8-GFP</sup> and *Lrh-1*<sup>AAV8-Cre</sup> mice fed HFD, n = 8 and n = 6 per group. **(C)** Assessment of VLDL secretion in *Lrh-1*<sup>AAV8-GFP</sup> and *Lrh-1*<sup>AAV8-Cre</sup> fed SD with n = 2 and n = 4 per group, respectively. **(D)** Hepatic/plasma cholesterol, lipoprotein profile and qPCR analysis of *Pcsk9* expression in livers from *Lrh-1*<sup>AAV8-GFP</sup> and *Lrh-1*<sup>AAV8-Cre</sup> mice fed HFD. For plasma cholesterol n = 14 and n = 9 per group, for lipoprotein profile n = 5 per group, and for *Pcsk9* expression, n = 5 and n = 4 per group. Error bars represent  $\pm$  SEM. Unpaired Student's *t* test for panel (D).

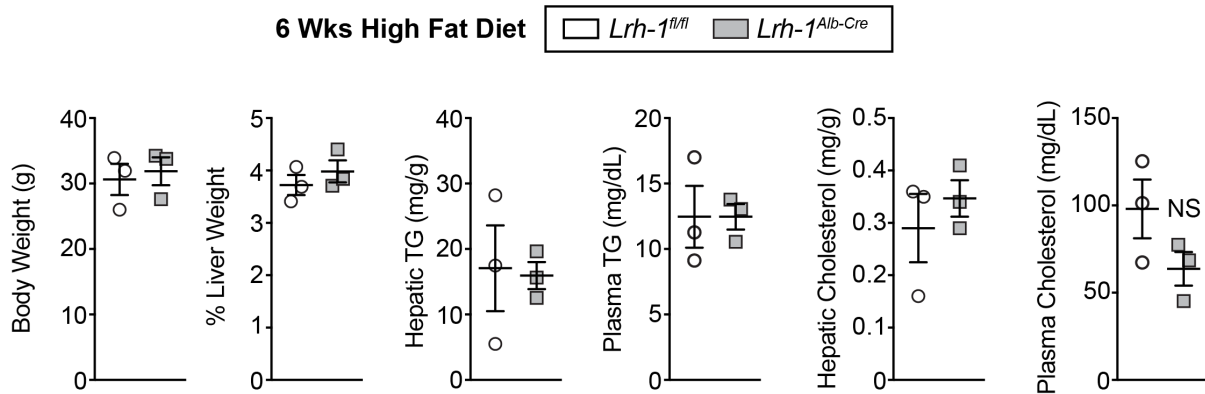

**Supplemental Fig. 3 *Lrh-1<sup>AAV-Alb-Cre</sup>* mice fed high fat diet do not exhibit significant changes in lipid metabolism.**

Body weight and measurement of plasma/hepatic metabolites of adult male *Lrh-1<sup>fl/fl</sup>* and *Lrh-1<sup>AAV-Alb-Cre</sup>* mice fed high fat diet. Number of mice per group was  $n = 3$ . Error bars represent  $\pm$  SEM.

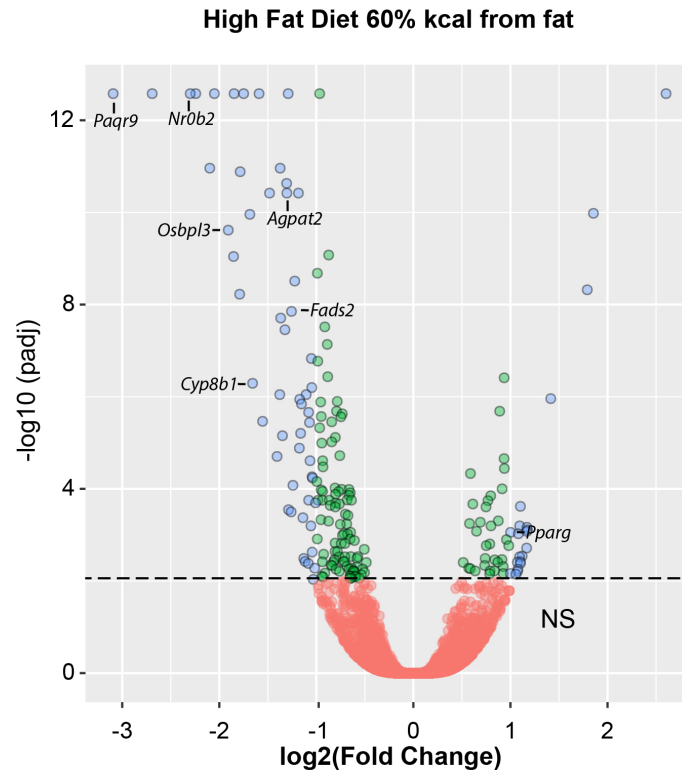

**Supplemental Fig 4. Volcano plot of DEGs in *Lrh-1*<sup>AAV8-Cre</sup> fed HFD.**

Volcano plot of DEGs between *Lrh-1*<sup>AAV8-GFP</sup> and *Lrh-1*<sup>AAV8-Cre</sup> mice fed HFD with DEGs of an adjusted p-value < 0.01 shown above the black dashed line (green circles), and those with < 0.01 and absolute log<sub>2</sub> fold change > 1.0 highlighted (blue circles).

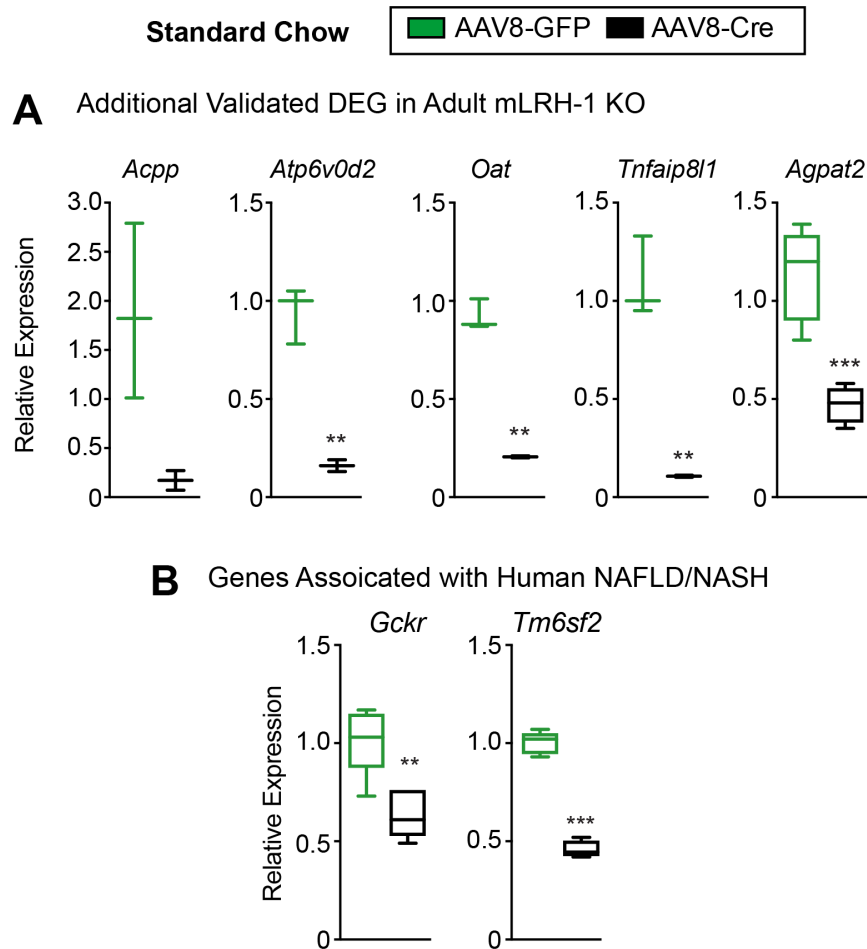

**Supplemental Fig. 5 Validation of DEGs in *Lrh-1*<sup>AAV8-Cre</sup> mice fed standard diet and expression of known risk alleles for NAFLD.**

**(A)** Relative gene expression by qPCR of *Accp*, *Atp6v0d2*, *Oat*, *Tnfaipa81* and *Agpat2* in livers from *Lrh-1*<sup>AAV8-GFP</sup> or *Lrh-1*<sup>AAV8-Cre</sup> male mice fed standard diet 8 wks post infection, n = 2, n = 3 per group. **(B)** qPCR analysis of known NAFLD risk alleles *Gckr* and *Tm6sf2* in livers from *Lrh-1*<sup>AAV8-GFP</sup> or *Lrh-1*<sup>AAV8-Cre</sup> mice fed standard diet, n = 5 per group. Error bars represent  $\pm$  SEM. Unpaired Student's *t* test for panels A and B.

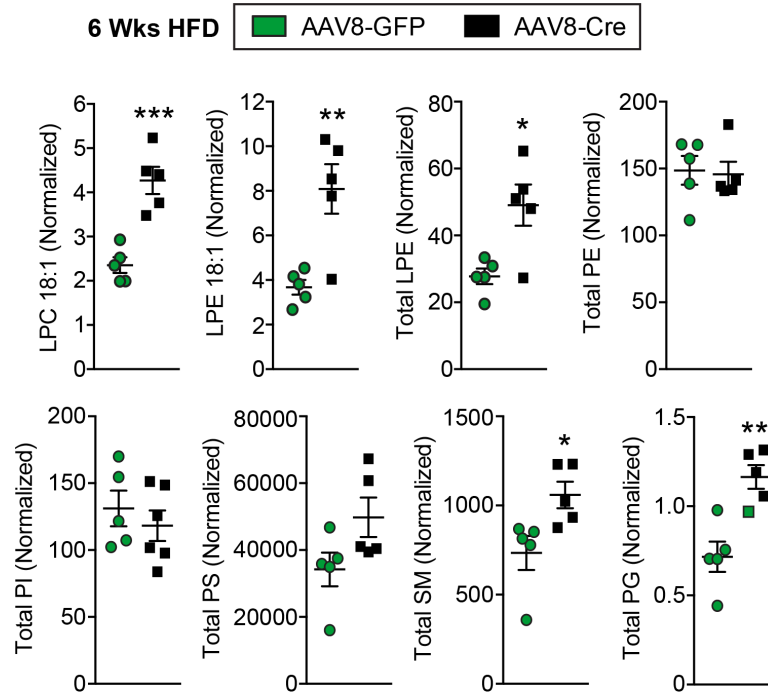

### Supplemental Fig. 6 Additional Measurements for Total Phospholipids.

Normalized values for total oleic acid lysophosphatidylcholine (LPC 18:1), oleic acid lysophosphatidylethanolamine (LPE 18:1), lysophosphatidylethanolamine (LPE), phosphatidylethanolamine (PE), phosphoinositol (PI), phosphatidylserine (PS), sphingomyelin (SM) and phosphatidylglycerol (PG) in control and *Lrh-1*<sup>AAV-Cre+hLrh1</sup> male mice fed HFD for 6 wks and 8 wks post infection; n = 5 per group. Error bars represent  $\pm$  SEM. Unpaired Student's *t* test for all bar graphs.

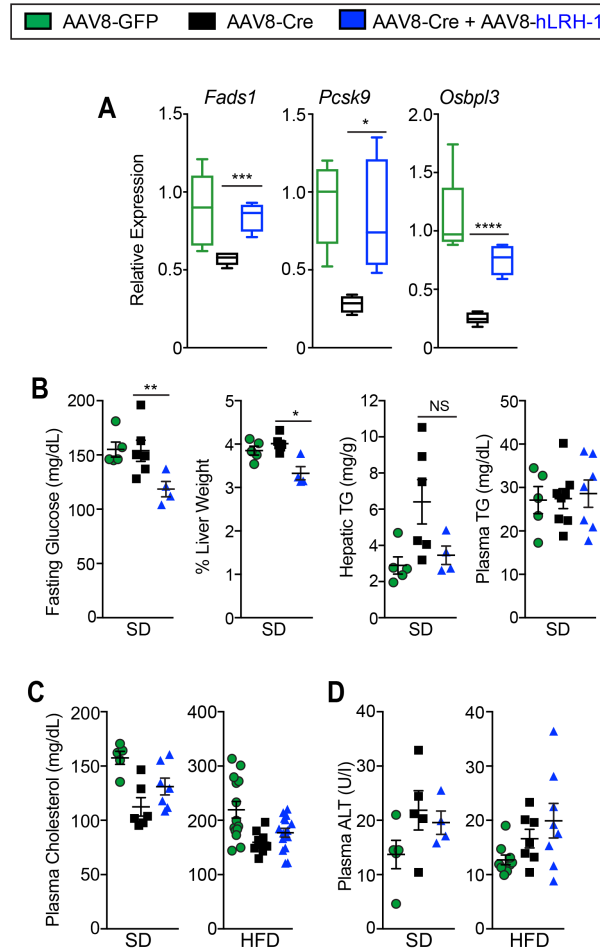

**Supplemental Fig. 7 Additional genes complemented by hLRH-1, hepatic/plasma cholesterol and plasma ALT measurements in *Lrh-1*<sup>AAV-Cre+hLrh1</sup>.**

**(A)** qPCR analysis of *Fads1*, *Pcsk9* and *Osbpl3* on livers of *Lrh-1*<sup>AAV-Cre+hLrh1</sup> male mice fed standard diet, 8 wks post infection. **(B)** Measurement of fasting glucose, % liver weight and TG values for mice as indicated maintained on standard diet with number per group shown in individual bars. **(C)** Measurement of fasting plasma cholesterol and plasma ALT in *Lrh-1*<sup>AAV-Cre+hLrh1</sup> fed standard diet (SD) or HFD. Number per group is indicated on bar graphs. Error bars represent  $\pm$  SEM. Unpaired Student's *t* test for panel A.



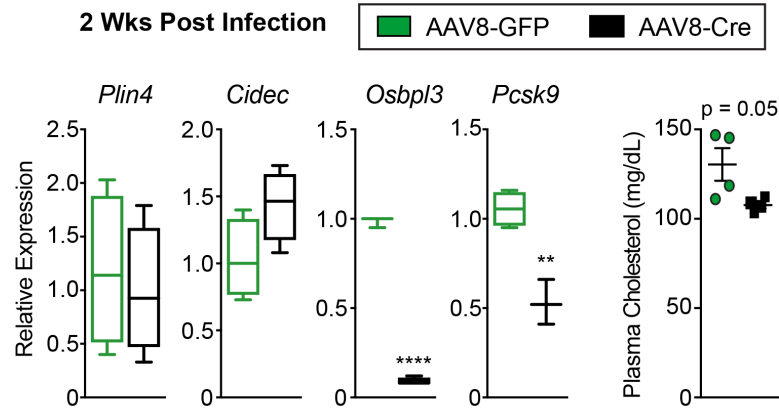

**Supplemental Fig. 8. Changes in hepatic gene expression and plasma cholesterol after acute ablation of LRH-1 in livers (*Lrh-1*<sup>AAV-Cre</sup>) compared to control mice.**

Hepatic expression of *Cidec*, *Plin4*, *Osbp3* and *Pcsk9* transcripts and fasting plasma cholesterol measurements in control and *Lrh-1*<sup>AAV-Cre</sup> mice fed standard diet 2 wks post-infection. Number per group n = 4. Error bars represent  $\pm$  SEM. Unpaired Student's *t* test.

**Supplementary Table S1 – Forward and Reverse Primers Used in Study**

| <b>Name</b>     | <b>Forward 5'-3'</b>     | <b>Reverse 5'-3'</b>      |
|-----------------|--------------------------|---------------------------|
| <i>36b4</i>     | GGCACCGAGGCAACAGTT       | TCATCCAGCAGGTGTTTGACA     |
| <i>Acacb</i>    | GGAAGTCTGCTTCCCATCTA     | GCAGTCTTCCATTCCAGCACA     |
| <i>Acpp</i>     | AGCCACCAAGGACGGAATT      | TGAAACCCGCTTGACATCAG      |
| <i>Acta2</i>    | AGATCATTGCCCTCCAGAAC     | CCAGCTTCGTCTGATTCTGT      |
| <i>Acpp</i>     | AGCCACCAAGGACGGAATT      | TGAAACCCGCTTGACATCAG      |
| <i>Agpat2</i>   | GAGGGTACACGCAACGACAAT    | AGAAAGACGAGTACACCACGG     |
| <i>Atp6v0d2</i> | GAGCTGTACTTCAATGTGGACCAT | TGAGTTAGGAGGCTGGCTTTG     |
| <i>Cidec</i>    | AGGACTTTATTGGCTGCCTG     | CATGCTGAAGAGGGTCCAG       |
| <i>Col1a1</i>   | CTTCACCTACAGCACCTTGT     | GGGAGGTCTTGGTGGTTTTGT     |
| <i>Elovl5</i>   | TGGGAAGGCAAATACAACCT     | GTCCATGAATTGATGAGTT       |
| <i>Fads1</i>    | GTTACCAATCAGCCTTCAAC     | TCATACTTGATGCCGTAATTGG    |
| <i>Fads2</i>    | TGAAGTCTCTCTGCGCCAAG     | CAGTCCCCAGACTTCTTCAG      |
| <i>Fasn</i>     | CCAAGACTGACTCGGCTACTG    | TCAGGTTGAGTTGGTTCTGCT     |
| <i>Gckr</i>     | CCATCTCCTGCCATGTCCAG     | CCTTAGCCTCAGTGATGGAGC     |
| <i>Gnmt</i>     | CCCACATGGTAACCCTGGAC     | GAAAGACGCCAAACAGTGTGG     |
| <i>Hamp2</i>    | CTTTGCACGGGGAAGAAAGC     | TGCAGATGGGGAAGTTGATGT     |
| <i>mLrh-1</i>   | CCATTACGGTCTCCTCACGTG    | AGGGACATCGTTTTCTCTGCG     |
| <i>hLRH-1</i>   | CAGAGAAAGCGTTGTCCTTACTG  | TTATTCCTTCTCCACGCATT      |
| <i>Oat</i>      | TGGCGGTTTATACCCTGTGT     | CCTGGTTTAAATGGTCAGCATTATC |
| <i>Osbpl3</i>   | GGATCGAGAAGCTGCAGAGAG    | GGTAGGTCCCATTGCTTACCC     |
| <i>Paqr9</i>    | CGAGAACCCACACTCTTCG      | CTCAGGGATCTTGCTCACGTT     |
| <i>Pcsk9</i>    | AATCAAGGAGCATGGGATCTC    | ACATTGCATCCAGTCAGGG       |
| <i>Pctp</i>     | CGTCCTGGCTCATTAACTGGG    | TGTGGTAGTTCTGACACGCTT     |
| <i>Pcyt1a</i>   | TGGAAGAGAAGAGCATCGACC    | CATCCGACTTTTCCCTCCTT      |
| <i>Pemt</i>     | GGCAATTGTCTACGTGGTTGC    | TGCAACCTGGTAGCTTTCTGT     |
| <i>Plcx2</i>    | CATTCTGCCATAGTTTTCAAGTGA | CCCCCGATATTAGAGAACATGTG   |
| <i>Plin4</i>    | AAACAGCAACAGACCCCTC      | AACTCCCATGTCCTTGTCTC      |
| <i>Scd1</i>     | AGAACTTACAAGGCACGGCT     | TTCTGAGAACTTGTGGTGGGC     |
| <i>Shp</i>      | ACGATCCTCTTCAACCCAGAT    | GTACCAGGGCTCCAAGACTTC     |
| <i>Slc27a2</i>  | TCTTTCAACACATCGCGGAGT    | TGCGGTGTTAAAAGTCCCAG      |
| <i>Slc27a5</i>  | TACTGGAGAGGTGGAGTGTGT    | CAACCTTACCCTCACACCCTG     |
| <i>Srebp1c</i>  | GGTTTCCAACATGACCTGAGC    | ATACCCTCCTCATAGCAGGCC     |
| <i>Tff3</i>     | AGTATCCCAAATGTGCCCTGG    | CATCAGCAGCAGGAGTCCAG      |
| <i>Tm6sf2</i>   | ATTCTACTGCCTGGCTGCCTA    | ACCCATGTGTGAGAAGTGGC      |
